# Supplementary material for: Preparation of a bifunctional ultrathin nickel phosphide nanosheet electrocatalyst for full water splitting
Source: Royal Society of Chemistry journal article supplement (doi:10.1039/d0se00893a), 2020-01-01
Supplement: d0se00893a1.pdf [file d0se00893a1.pdf]

## Supplementary Information

### Preparation of Bifunctional Ultrathin Nickel Phosphide Nanosheet Electrocatalyst for Full Water Splitting

Nouraz Mushtaq<sup>a</sup>, Chen Qiao<sup>a</sup>, Hassina Tabassum<sup>b</sup>, Muhammad Naveed<sup>a</sup>, Muhammad Tahir<sup>a</sup>, Youqi Zhu<sup>a</sup>, Muhammad Naeem<sup>a</sup>, Waqar Younas<sup>a</sup>, Chuanbao Cao<sup>a\*</sup>

<sup>a</sup>Research Center of Materials Science, Beijing Key Laboratory of Construction Tailorable Advanced Functional Materials and Green Applications, Beijing Institute of Technology, Beijing 100081, China.

<sup>b</sup>College of Engineering, Peking University, Beijing 100871, China.

\*Corresponding author E-mail: cbcao@bit.edu.cn

### Experimental Section

All chemicals are used without any further purification.

#### Synthesis of Ni(OH)<sub>2</sub> Nanosheet Precursor

Ni(OH)<sub>2</sub> ultrathin freestanding nanosheets had grown by a facetious microwave-assisted technique conferring our past study<sup>1</sup>. In a distinctive process, 15 mmol of Ni(NO<sub>3</sub>)<sub>2</sub>·6H<sub>2</sub>O and 60 mmol urea (CH<sub>4</sub>N<sub>2</sub>O) had been liquefied in 240 mL synthesis solvent of DI water (deionized water) and E.G (ethyleneglycol) with volume ratio 1:7 for 0.5 h to form a rich olive green uniform solution. The solution was formerly poured into a 1000 mL three-neck flask and put in the microwave treatment in a SINEOMAS-II+ microwave reactor at 700 W for 30 minutes in continuous stirring. Lastly, a fluffy olive green colloid precipitous had acquired, cooled it at room temperature recovered through centrifugation and wash away various times by DI water and ethanol.

#### Synthesis of Nickel Phosphide Ni<sub>2</sub>P Ultrathin Freestanding Nanosheets

Ni<sub>2</sub>P were prepared through chemical vapor deposition (CVD) method by using above fabricated nickel hydroxide Ni(OH)<sub>2</sub> and sodium hypophosphite (NaH<sub>2</sub>PO<sub>2</sub>) with a molar ratio (1:5). In a

typical preparation of Ni<sub>2</sub>P, both reactants were placed in a reactant tube in two different boats for 25 minutes and removed other gases with Ar flow. Then the precursors were heated at a temperature of 350°C through a temperature ramp of 1 °C/min and sustained on the final temperature for 180 min under Ar flow. Later cooled at room temperature and collected the black product.

### **Material Characterization**

X-ray diffractometry (PANalytical XRD, with Cu K $\alpha$  radiation) was used for the investigation of crystallographic phase. Microstructures and morphology of samples were observed via field emission scanning electron microscopy (FESEM, JEOL JEM-2100 F) fortified with energy-dispersive X-ray spectroscopy (EDS), transmission electron microscopy (TEM, JSM- 2100F, 200 kV), and high-resolution TEM (HRTEM, FEI Tecnai G2 F20, 200 kV). Using Veeco instrument atomic force microscopy (AFM) had been performed. Brunauer-Emmett-Teller surface areas (BET) was used for investigation of the specific surface area. PHI Quantera II (Japan) with an Al K= 280.00 eV excitation source was used for the measurements of X-ray photoelectron spectroscopy (XPS).

### **Electrochemical Measurements**

Electrochemical work station (CHI-660E) was used for all HER and OER in a three electrode system. Two electrode systems are used for overall water splitting, and saturated calomel (SCE) and Pt foil were taken as counter and reference electrodes for electrochemical measurements. Now a distinctive making of working electrode, a glassy carbon electrode (GCE) was used, 14 mg of Ni<sub>2</sub>P was uniformly dissolved in water/ethanol solution (1/0.880 ml) and put it on sonication for 30 minutes, 940  $\mu$ l of the stock solution and 60  $\mu$ l of Nafion solution (Sigma Aldrich, 5wt%) were homogeneously mixed and sonicated for 30 min. Then, catalytic electrodes were fabricated by

wise dropped 5  $\mu\text{l}$  of the slurry on glassy carbon electrode (GCE) and dried it at room temperature.

Reversible Hydrogen Electrode used as a standard for all potentials as follows:

$$E(\text{RHE}) = E(\text{SCE}) + 0.059 \text{ pH} + E_0$$

Overall water electrolyzer has been prepared with 7  $\mu\text{l}$  of the ink was loaded on  $0.05 \text{ cm} \times 1 \text{ cm}$  active area of carbon fiber paper electrode, before testing dried it at room temperature.

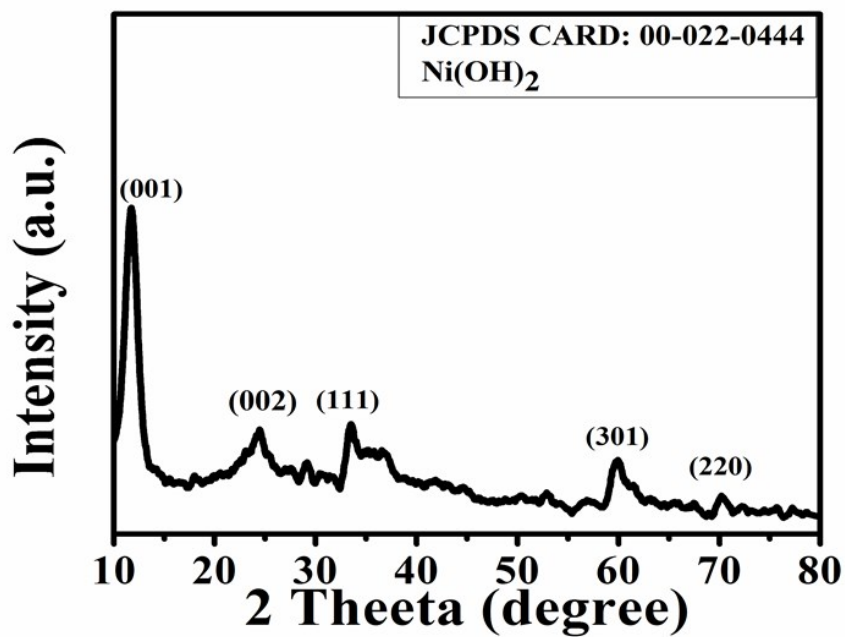

Figure S1. XRD pattern of Ni (OH)<sub>2</sub>

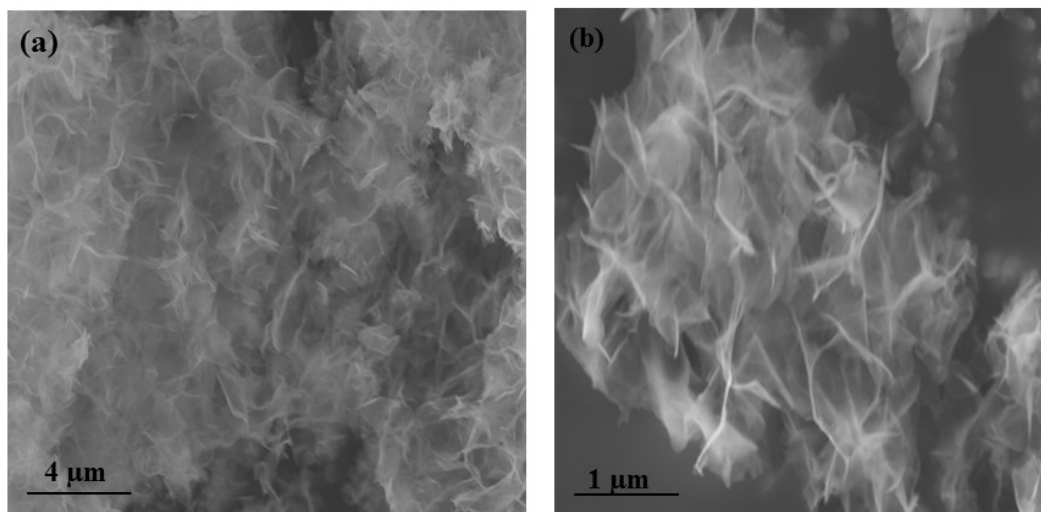

**Figure S2.** (a&b) SEM images of  $\text{Ni}(\text{OH})_2$

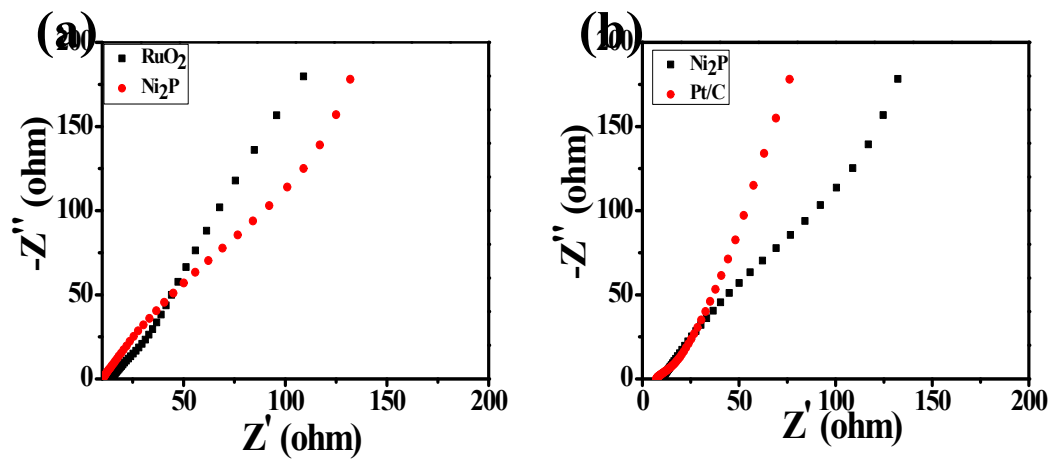

**Figure S3.** (a) Nyquist Plots of RuO<sub>2</sub> and Ni<sub>2</sub>P, (b) Nyquist plots of Ni<sub>2</sub>P and Pt/C

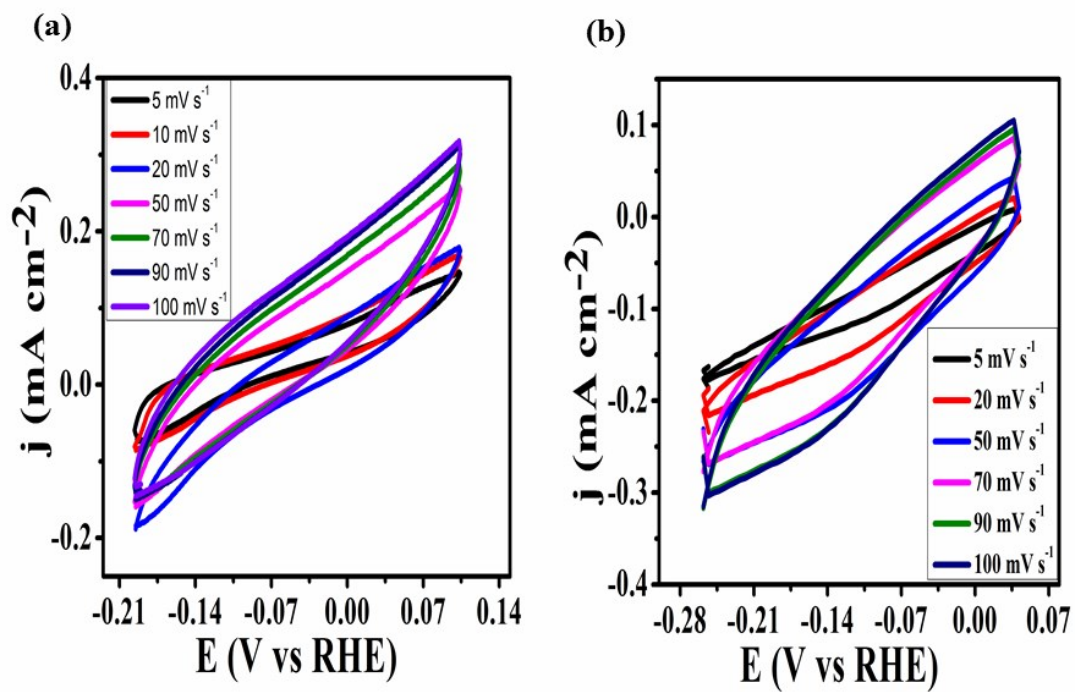

**Figure S4.** (a, b) Ni<sub>2</sub>P CV curves at different scan rates for OER and HER

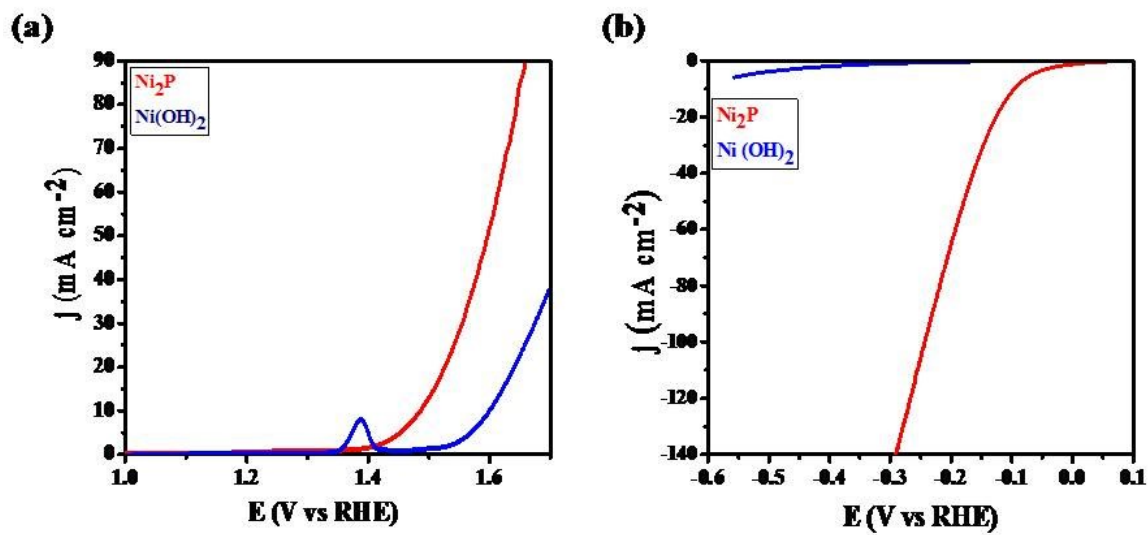

**Figure S5.** (a) OER polarization curves of Ni(OH)<sub>2</sub> and Ni<sub>2</sub>P, (b) HER polarization curves of Ni(OH)<sub>2</sub> and Ni<sub>2</sub>P

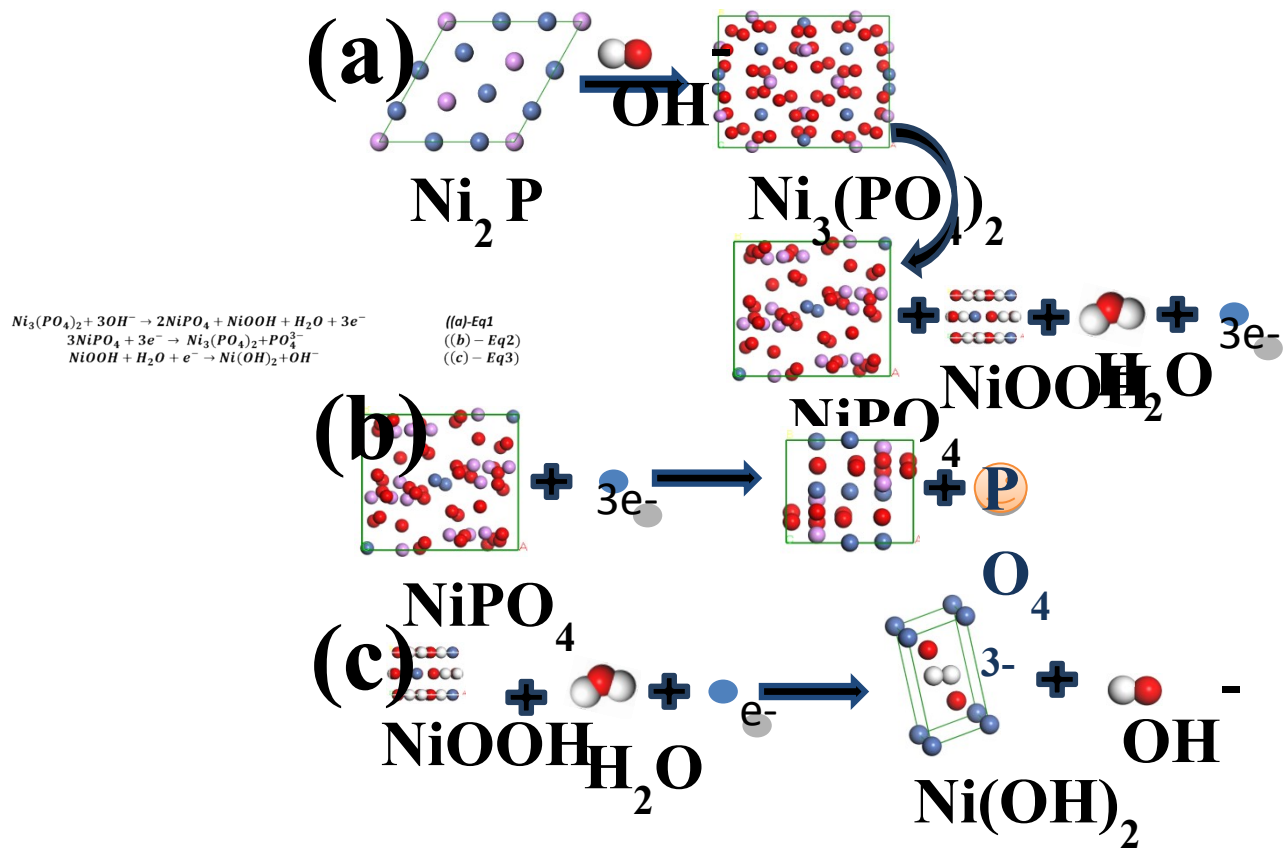

**Figure S6.** Proposed surface mechanism for OER process on Ni<sub>2</sub>P nanosheets.



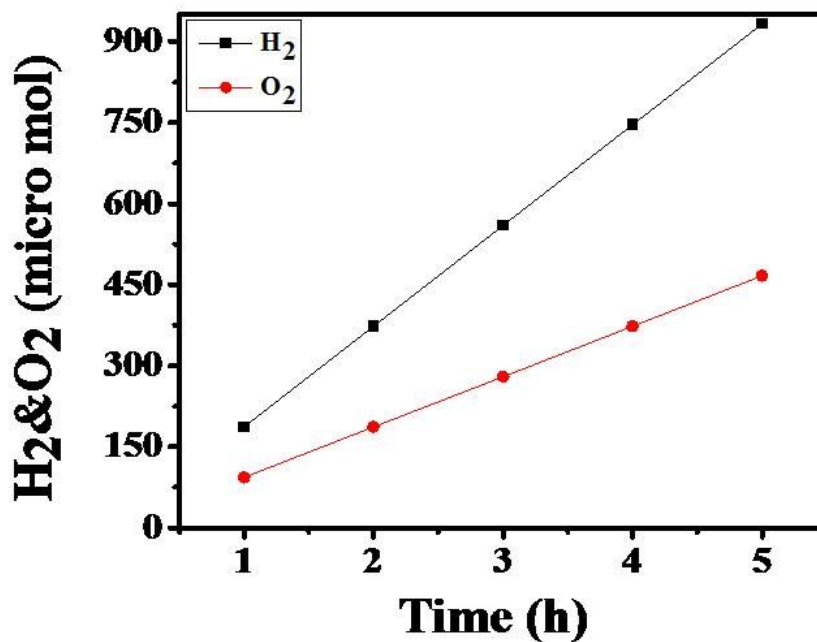

Figure S7. Production of H<sub>2</sub>&O<sub>2</sub>

Above graph is generated through following calculations.

$C = I \cdot t$  (C= number of coulombs, I= current in amperes and t= time in seconds)

Charge of electron=  $1.60 \cdot 10^{-19}$  coulombs

1 mole of electrons contain=  $6.02 \cdot 10^{23}$  Avogadro's number

1 mole of electrons carry=  $1.60 \cdot 10^{-19} \cdot 6.02 \cdot 10^{23} = 96485$

F= 96485

Now we have

I= 0.01 A & t= 3600 s

Now considering the H<sub>2</sub> producing equation

1 mol of H<sub>2</sub> requires 2 mol of electrons so

Amount of H<sub>2</sub> produced=  $3600 \cdot 0.01 / (2 \cdot 96485) = 186.55 \mu \text{ mol}$

Use this equation for different time period and get all calculations.

**Table S1.** Comparison of the HER performances of Ni<sub>2</sub>P with the best-reported nickel phosphide and other reported non-precious HER electrocatalysts.

| Catalyst                                                 | Morphology                     | Electrolyte                         | Over potential (η <sub>10</sub> )( mV) | Tafel Slope (mV dec <sup>-1</sup> ) | Ref.      |
|----------------------------------------------------------|--------------------------------|-------------------------------------|----------------------------------------|-------------------------------------|-----------|
| Ni <sub>2</sub> P                                        | Freestanding Porous nanosheets | 1M KOH                              | 96                                     | 94                                  | This work |
| Ni <sub>5</sub> P <sub>4</sub> /C                        | Nanocrystals                   | 0.5M H <sub>2</sub> SO <sub>4</sub> | 103                                    | 51                                  | 2         |
| Ni <sub>12</sub> P <sub>5</sub> /C                       |                                |                                     | 182                                    | 63                                  |           |
| Ni <sub>2</sub> P/C                                      |                                |                                     | 135                                    | 62                                  |           |
| Ni <sub>x</sub> P/NF                                     | Nanospheres                    | 1M KOH                              | 63                                     | 55                                  | 3         |
| Ni-Ni <sub>x</sub> P/CC                                  | Nanospheres                    | 0.5M H <sub>2</sub> SO <sub>4</sub> | 164                                    | 76                                  | 4         |
| Ni <sub>2</sub> P                                        | Nanoparticles                  | 0.5M H <sub>2</sub> SO <sub>4</sub> | 102                                    | 46                                  | 5         |
| CoS <sub>x</sub>                                         | Freestanding sheets            | 1M KOH                              | 127                                    | 123                                 | 6         |
| Ni <sub>3</sub> S <sub>2</sub>                           | Nanosheet/NF                   | 1M KOH                              | 223                                    | -                                   | 7         |
| Ni <sub>3</sub> S <sub>2</sub>                           | Nanoparticles/CNTs             | 1M KOH                              | 480                                    | 102                                 | 8         |
| Ni <sub>0.33</sub> Co <sub>0.67</sub> S <sub>2</sub> /Ti | Nanowires                      | 1M KOH                              | 88                                     | 118                                 | 9         |

|                                                  |                      |                                     |                               |     |    |
|--------------------------------------------------|----------------------|-------------------------------------|-------------------------------|-----|----|
| foil                                             |                      |                                     |                               |     |    |
| NiSe <sub>2</sub>                                | Nanosheets           | 1M KOH                              | 184                           | 184 | 10 |
| Co <sub>9</sub> S <sub>8</sub> @MoS <sub>2</sub> | Octahedrons/CNFs     | 1M KOH                              | 190                           | 110 | 11 |
| CoP                                              | Nanowires/CC         | 1M KOH                              | 110                           | 129 | 12 |
|                                                  |                      |                                     |                               |     |    |
| CoP                                              | Film                 | 1M KOH                              | 94                            | 42  | 13 |
| CoN <sub>x</sub> /C                              | NPs/Porous carbon    | 1M KOH                              | 170                           | 75  | 14 |
| MoS <sub>2</sub> -Ni <sub>3</sub> S <sub>2</sub> | Nanorods/NF          | 1M KOH                              | 98                            | 61  | 15 |
| NiP                                              | Nanoplates           | 1M KOH                              | 160 (20 mA cm <sup>-2</sup> ) | 107 | 16 |
| NiMnCoS@rGO                                      | Nanoparticles@sheets | 1M KOH                              | 150                           | 52  | 17 |
| Co@N-C                                           | Nanoparticles        | 1M KOH                              | 210                           | 108 | 18 |
| Co-Ni@NC                                         | Nanospheres          | 1M KOH                              | 180                           | 193 | 19 |
| CoO <sub>x</sub> @CN                             | Nanoparticles@sheets | 1M KOH                              | 232                           | 115 | 20 |
| CoPs                                             | Nanoplates/CFP       | 0.5M H <sub>2</sub> SO <sub>4</sub> | 48                            | 56  | 21 |
| MoS <sub>2</sub> /CoSe <sub>2</sub>              | Nanosheets/nanobelts | 0.5M H <sub>2</sub> SO <sub>4</sub> | 68                            | 39  | 22 |
| MoS <sub>2</sub>                                 | Film                 | 0.5M H <sub>2</sub> SO <sub>4</sub> | 260                           | 50  | 23 |
| WS <sub>2</sub>                                  | Nanosheets           | 0.5M H <sub>2</sub> SO <sub>4</sub> | 250                           | 60  | 24 |
| Ni-CoSe <sub>2</sub>                             | NPs-nanobelts        | 0.5M H <sub>2</sub> SO <sub>4</sub> | 90                            | 39  | 25 |
| MoS <sub>2</sub> @rGO@Mo                         | Nanosheet            | 1 M KOH                             | 123                           | 62  | 26 |
| CoO/MoO <sub>x</sub>                             | Nanorods             | 1 M KOH                             | 40                            | 44  | 27 |
| Ni/NiO                                           | Nanosheet            | 1 M KOH                             | 110                           | 43  | 28 |
| FeP                                              | Nanoparticles        | 0.5M H <sub>2</sub> SO <sub>4</sub> | 147                           | 65  | 29 |
| FeNi <sub>3</sub> /FeNiO <sub>x</sub>            | Nanosheet            | 1 M KOH                             | 170                           |     | 30 |
| NiCo/NiCoO <sub>x</sub>                          | nanowire             | 1 M KOH                             | 155                           | 80  | 31 |
| Co <sub>x</sub> P                                | Nanoparticles        | 0.5M H <sub>2</sub> SO <sub>4</sub> | 110                           | 58  | 32 |
| Co <sub>x</sub> P                                | Nanocatalyst         | 0.5M H <sub>2</sub> SO <sub>4</sub> | 144                           | 58  | 33 |
| MnMoO <sub>4</sub>                               | Nanosheet            | 1 M KOH                             | 179                           | 56  | 34 |
| Co/Co <sub>3</sub> O <sub>4</sub>                | Nanosheet            | 1 M KOH                             | 90                            | 44  | 35 |

**Table S2.** Comparison of the OER performances of Ni<sub>2</sub>P with the best-reported nickel phosphide and other reported non-precious OER electrocatalysts.

| Catalyst                                                 | Morphology                     | Electrolyte | Over potential ( $\eta_{10}$ ) mV | TafelSlope (mV dec <sup>-1</sup> ) | Ref.      |
|----------------------------------------------------------|--------------------------------|-------------|-----------------------------------|------------------------------------|-----------|
| Ni <sub>2</sub> P                                        | Freestanding porous nanosheets | 1M KOH      | 255                               | 57                                 | This work |
| Ni <sub>2</sub> P <sub>4</sub> O <sub>12</sub>           | Nanocrystals                   | 1M KOH      | 270                               | -                                  |           |
| NiP                                                      | Hollow dendritic arcitecture   | 1M KOH      | 303 920 (20 mA cm <sup>-2</sup> ) | 67.3                               | 36        |
| NiO@NiP                                                  | Nanosheet                      | 1M KOH      | 292                               | 123                                | 37        |
| CoP                                                      | Film                           | 1M KOH      | 345                               | 47                                 | 38        |
| Fe doped Ni <sub>2</sub> P                               | Nanosheet                      | 1M KOH      | 257                               | 96                                 | 39        |
| CuCo <sub>2</sub> S <sub>4</sub>                         | Nanosheet                      | 1M KOH      | 310                               | 86                                 | 40        |
| C@CoP <sub>2</sub>                                       | Nanostructure coreshell        | 1M KOH      | 234                               | 63.8                               | 4         |
| CoS                                                      | Nanosheet                      | 1M KOH      | 312                               | -                                  | 41        |
| Co <sub>9</sub> S <sub>8</sub>                           | Nanosheets                     | 1M KOH      | 288                               | 79                                 | 42        |
| CuCo <sub>2</sub> S <sub>4</sub>                         | Nanosheets                     | 1M KOH      | 310                               | 86                                 | 38        |
| Zn <sub>0.76</sub> Co <sub>0.24</sub> S/CoS <sub>2</sub> | Nanowires                      | 1M KOH      | >316                              | 79                                 | 41        |
| Co <sub>9</sub> S <sub>8</sub> @MoS <sub>2</sub>         | Octahedrons/CNFs               | 1M KOH      | 430                               | 61                                 | 9         |
| NiFeLDH                                                  | Nanoplates                     | 1M KOH      | 302                               | 40                                 | 42        |
| CoMnLDH                                                  | Nanoplates                     | 1M KOH      | 324                               | 43                                 | 43        |
| Co <sub>5</sub> MnLDH/MWCNT                              | Nanosheets/MWCNT               | 1M KOH      | 300                               | 73.6                               | 44        |
| NiMnCoS@rGO                                              | Nanoparticles@sheets           | 1M KOH      | 249                               | 66                                 | 15        |
| (Ni,Co) <sub>0.85</sub> Se@CC                            | Nanotubes@CC                   | 1M KOH      | 255                               | 79                                 | 45        |
| CoCrLDH                                                  | Nanosheet                      | 1M KOH      | 340                               | 81                                 | 46        |

|                                                                                             |                      |          |     |      |    |
|---------------------------------------------------------------------------------------------|----------------------|----------|-----|------|----|
| Ni (OH) <sub>2</sub>                                                                        | Nanosheet/NF         | 1M KOH   | 170 | 150  | 47 |
| Zn <sub>4-x</sub> Co <sub>x</sub> SO <sub>4</sub> (OH) <sub>6.0.5</sub><br>H <sub>2</sub> O | Nanoplates           | 0.5M KOH | 370 | 60   | 48 |
| NiP                                                                                         | Nanoplates           | 1M KOH   | 320 | 72.2 | 14 |
| NiMnCoS@rGO                                                                                 | Nanoparticles@sheets | 1M KOH   | 320 | 53   | 15 |

**Table S3.** Comparison of overall water splitting performances of Ni<sub>2</sub>P||Ni<sub>2</sub>P with the best reported bi-functional electrocatalysts in the basic electrolyte.

| Cathode catalyst               | Anode catalyst                 | Electrolyte | HER Over potential (η <sub>10</sub> ) mV | OER Over potential (η <sub>10</sub> ) mV | E at j= 10 mA cm <sup>-2</sup> (V) | Ref       |
|--------------------------------|--------------------------------|-------------|------------------------------------------|------------------------------------------|------------------------------------|-----------|
| Ni <sub>2</sub> P              | Ni <sub>2</sub> P              | 1M KOH      | 96                                       | 255                                      | 1.47                               | This work |
| CoS <sub>x</sub>               | Co <sub>9</sub> S <sub>8</sub> | 1M KOH      | 127                                      | 288                                      | 1.55 (20 mA cm <sup>-2</sup> )     | 7         |
| Ni <sub>x</sub> P <sub>y</sub> | Ni <sub>x</sub> P <sub>y</sub> | 1M KOH      | 160 (20 mA cm <sup>-2</sup> )            | 370                                      | 1.57                               | 48        |
| NiS                            | Ni <sub>2</sub> P              | 1M KOH      | 126                                      | 265 (20 mA cm <sup>-2</sup> )            | 1.67                               | 14        |
| Ni(OH) <sub>2</sub> /NF        | Ni(OH) <sub>2</sub> /NF        | 1M KOH      | 178 (20 mA cm <sup>-2</sup> )            | 330 (50 mA cm <sup>-2</sup> )            | 1.68                               | 47        |
| NiS/NF                         | Ni/NF                          | 1M KOH      | 158 (20 mA cm <sup>-2</sup> )            | 355 (50 mA cm <sup>-2</sup> )            | 1.67                               | 49        |
| Ni <sub>2</sub> P/Ni/F         | Ni <sub>2</sub> P/Ni/NF        | 1M KOH      | 90                                       | 200                                      | 1.49                               | 50        |
| NiMnCoS@rGO                    | NiMnCoS@rGO                    | 1M KOH      | 150                                      | 320                                      | 1.56 (20 mA cm <sup>-2</sup> )     | 51        |
| Co-S/CTs/CP                    | Co-S/CTs/CP                    | 1M KOH      | 190                                      | 307                                      | 1.74                               | 52        |



## Reference:

1. Y. Zhu, C. Cao, S. Tao, W. Chu, Z. Wu and Y. Li, *Scientific reports*, 2014, **4**, 5787.
2. X. Li, J. Rong and B. Wei, *ACS nano*, 2010, **4**, 6039-6049.
3. Q. Ren, H. Jin, X. Xu, A. Liu, J. Li, J. Wang and S. Wang, *Electrochimica Acta*, 2019, **298**, 229-236.
4. C. Zhang, B. Xin, Z. Xi, B. Zhang, Z. Li, H. Zhang, Z. Li and J. Hao, *ACS Sustainable Chemistry & Engineering*, 2017, **6**, 1468-1477.
5. L.-L. Feng, G. Yu, Y. Wu, G.-D. Li, H. Li, Y. Sun, T. Asefa, W. Chen and X. Zou, *Journal of the American Chemical Society*, 2015, **137**, 14023-14026.
6. T.-W. Lin, C.-J. Liu and C.-S. Dai, *Applied Catalysis B: Environmental*, 2014, **154**, 213-220.
7. Z. Peng, D. Jia, A. M. Al - Enizi, A. A. Elzatahry and G. Zheng, *Advanced Energy Materials*, 2015, **5**, 1402031.
8. H. Liang, L. Li, F. Meng, L. Dang, J. Zhuo, A. Forticaux, Z. Wang and S. Jin, *Chemistry of Materials*, 2015, **27**, 5702-5711.
9. H. Zhu, J. Zhang, R. Yanzhang, M. Du, Q. Wang, G. Gao, J. Wu, G. Wu, M. Zhang and B. Liu, *Advanced Materials*, 2015, **27**, 4752-4759.
10. J. Tian, Q. Liu, A. M. Asiri and X. Sun, *Journal of the American Chemical Society*, 2014, **136**, 7587-7590.
11. N. Jiang, B. You, M. Sheng and Y. Sun, *Angewandte Chemie International Edition*, 2015, **54**, 6251-6254.
12. H.-W. Liang, S. Brüller, R. Dong, J. Zhang, X. Feng and K. Müllen, *Nature communications*, 2015, **6**, 7992.
13. Y. Yang, K. Zhang, H. Lin, X. Li, H. C. Chan, L. Yang and Q. Gao, *Acs Catalysis*, 2017, **7**, 2357-2366.
14. J. Li, J. Li, X. Zhou, Z. Xia, W. Gao, Y. Ma and Y. Qu, *ACS applied materials & interfaces*, 2016, **8**, 10826-10834.
15. R. Miao, J. He, S. Sahoo, Z. Luo, W. Zhong, S.-Y. Chen, C. Guild, T. Jafari, B. Dutta and S. A. Cetegen, *ACS Catalysis*, 2016, **7**, 819-832.
16. J. Wang, D. Gao, G. Wang, S. Miao, H. Wu, J. Li and X. Bao, *Journal of Materials Chemistry A*, 2014, **2**, 20067-20074.
17. J. Deng, P. Ren, D. Deng and X. Bao, *Angewandte Chemie International Edition*, 2015, **54**, 2100-2104.
18. H. Jin, J. Wang, D. Su, Z. Wei, Z. Pang and Y. Wang, *Journal of the American Chemical Society*, 2015, **137**, 2688-2694.
19. M. Cabán-Acevedo, M. L. Stone, J. Schmidt, J. G. Thomas, Q. Ding, H.-C. Chang, M.-L. Tsai, J.-H. He and S. Jin, *Nature materials*, 2015, **14**, 1245.
20. M.-R. Gao, J.-X. Liang, Y.-R. Zheng, Y.-F. Xu, J. Jiang, Q. Gao, J. Li and S.-H. Yu, *Nature communications*, 2015, **6**, 5982.
21. J. Kibsgaard, Z. Chen, B. N. Reinecke and T. F. Jaramillo, *Nature materials*, 2012, **11**, 963.
22. D. Voiry, H. Yamaguchi, J. Li, R. Silva, D. C. Alves, T. Fujita, M. Chen, T. Asefa, V. B. Shenoy and G. Eda, *Nature materials*, 2013, **12**, 850.
23. Y. F. Xu, M. R. Gao, Y. R. Zheng, J. Jiang and S. H. Yu, *Angewandte Chemie International Edition*, 2013, **52**, 8546-8550.
24. J. Huang, Y. Sun, Y. Zhang, G. Zou, C. Yan, S. Cong, T. Lei, X. Dai, J. Guo and R. Lu, *Advanced Materials*, 2018, **30**, 1705045.
25. X. Guo, Y. Qian, W. Zhang, C. Qian, F. Xu, S. Qian, H. Yang, A. Yuan and T. Fan, *Journal of Alloys and Compounds*, 2018, **765**, 835-840.

26. B. He, L. Chen, M. Jing, M. Zhou, Z. Hou and X. Chen, *Electrochimica Acta*, 2018, **283**, 357-365.
27. X. Yan, L. Tian, S. Atkins, Y. Liu, J. Murowchick and X. Chen, *ACS Sustainable Chemistry & Engineering*, 2016, **4**, 3743-3749.
28. X. Yan, L. Tian and X. Chen, *Journal of Power Sources*, 2015, **300**, 336-343.
29. L. Tian, X. Yan and X. Chen, *ACS Catalysis*, 2016, **6**, 5441-5448.
30. X. Yan, L. Tian, K. Li, S. Atkins, H. Zhao, J. Murowchick, L. Liu and X. Chen, *Advanced Materials Interfaces*, 2016, **3**, 1600368.
31. X. Yan, K. Li, L. Lyu, F. Song, J. He, D. Niu, L. Liu, X. Hu and X. Chen, *ACS applied materials & interfaces*, 2016, **8**, 3208-3214.
32. L. Tian, J. Murowchick and X. Chen, *Sustainable Energy & Fuels*, 2017, **1**, 62-68.
33. L. Tian, X. Yan, X. Chen, L. Liu and X. Chen, *Journal of Materials Chemistry A*, 2016, **4**, 13011-13016.
34. X. Yan, L. Tian, J. Murowchick and X. Chen, *Journal of Materials Chemistry A*, 2016, **4**, 3683-3688.
35. X. Yan, L. Tian, M. He and X. Chen, *Nano letters*, 2015, **15**, 6015-6021.
36. S. Hao, N. Chen, Q. Liu, Y. Xie, H. Fu and Y. Yang, *Chemistry—An Asian Journal*, 2018, **13**, 944-949.
37. J. Chen, Y. Li, G. Sheng, L. Xu, H. Ye, X. Z. Fu, R. Sun and C. P. Wong, *ChemCatChem*, 2018, **10**, 2248-2253.
38. M. Chauhan, K. P. Reddy, C. S. Gopinath and S. Deka, *ACS Catalysis*, 2017, **7**, 5871-5879.
39. M. M. Alsabban, X. Yang, W. Wahyudi, J.-H. Fu, M. N. Hedhili, J. Ming, C.-W. Yang, M. A. Nadeem, H. Idriss and Z. Lai, *ACS applied materials & interfaces*, 2019.
40. S. Ju, Y. Liu, H. Chen, F. Tan, A. Yuan, X. Li and G.-X. Zhu, *ACS Applied Energy Materials*, 2019.
41. Y. Liang, Q. Liu, Y. Luo, X. Sun, Y. He and A. M. Asiri, *Electrochimica Acta*, 2016, **190**, 360-364.
42. F. Song and X. Hu, *Nature communications*, 2014, **5**, 4477.
43. F. Song and X. Hu, *Journal of the American Chemical Society*, 2014, **136**, 16481-16484.
44. G. Jia, Y. Hu, Q. Qian, Y. Yao, S. Zhang, Z. Li and Z. Zou, *ACS applied materials & interfaces*, 2016, **8**, 14527-14534.
45. C. Xia, Q. Jiang, C. Zhao, M. N. Hedhili and H. N. Alshareef, *Advanced Materials*, 2016, **28**, 77-85.
46. C. Dong, X. Yuan, X. Wang, X. Liu, W. Dong, R. Wang, Y. Duan and F. Huang, *Journal of Materials Chemistry A*, 2016, **4**, 11292-11298.
47. Y. Rao, Y. Wang, H. Ning, P. Li and M. Wu, *ACS applied materials & interfaces*, 2016, **8**, 33601-33607.
48. S. Dutta, C. Ray, Y. Negishi and T. Pal, *ACS applied materials & interfaces*, 2017, **9**, 8134-8141.
49. X. Xiao, D. Huang, Y. Fu, M. Wen, X. Jiang, X. Lv, M. Li, L. Gao, S. Liu and M. Wang, *ACS applied materials & interfaces*, 2018, **10**, 4689-4696.
50. W. Zhu, X. Yue, W. Zhang, S. Yu, Y. Zhang, J. Wang and J. Wang, *Chemical Communications*, 2016, **52**, 1486-1489.
51. J. Wang, W. Cui, Q. Liu, Z. Xing, A. M. Asiri and X. Sun, *Advanced materials*, 2016, **28**, 215-230.
52. B. You, N. Jiang, M. Sheng, M. W. Bhushan and Y. Sun, *Acs Catalysis*, 2015, **6**, 714-721.
